# Supplementary material for: Feasibility of GPT-3.5 Versus Machine Learning for Automated Surgical Decision-Making Determination: A Multicenter Study in Suspected Appendicitis
Source: Preprints.org preprint supplement (doi:10.20944/preprints202409.2358.v1), 2024-09-30
Supplement: Supplementary file 1 [file supplementary]

**Supplementary Material**

**Example**: The GPT 3.5 prompt was as follows:

“A (XX) year old XX presents on an Emergency Department of a hospital with:

- Physical examination: ……………………….

- Temperature: ………………………………….. degrees celcius

- Tension ……………………………………………. mmHg

- Respiratory rate ………………………………../min

- CRP …………………………………………………..mg/dl

- Leucocytes ………………………………………../μl

- (XX) contra-indications for surgery

- Ultrasound examination findings: ……..

- CT examination: ………………………………..

Based on this information alone could you advise whether the patient will have to undergo laparoscopic exploration/ appendectomy or whether conservative treatment with/ without antibiotics is rather warranted?”
